# Supplementary material
Source: publisher site journal article supplement (https://www.dovepress.com/article/294968)
Supplement: Supplementary file 1 [file get_supplementary_file.php]

**Figure S1**. Flowchart of patient selection process.


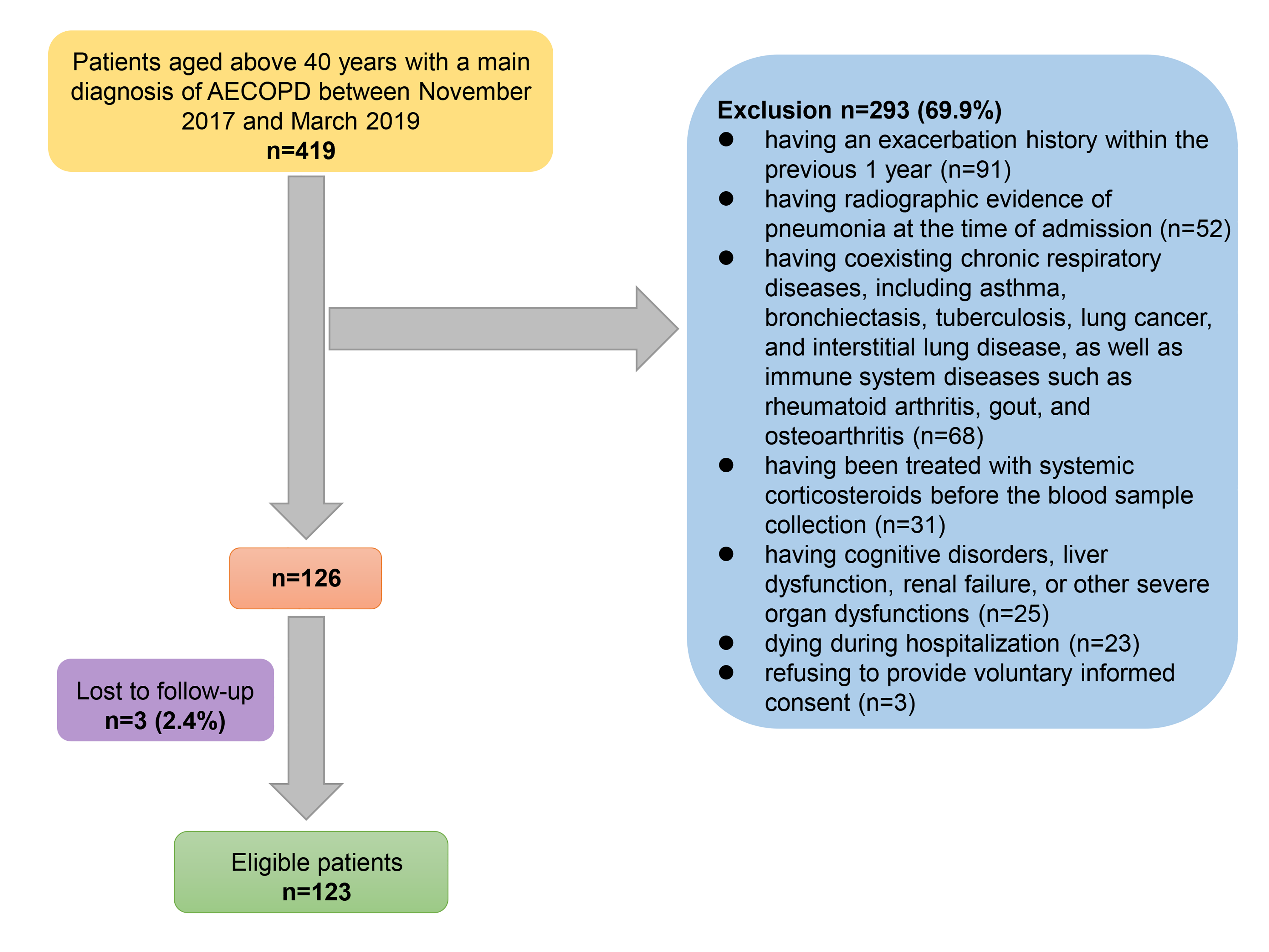


**Abbreviations:** AECOPD, acute exacerbation of chronic obstructive pulmonary disease.
